# Supplementary material
Source: PubMed Central journal article supplement (PMC7538875)
Supplement: mmc1.pdf [file mmc1.pdf]

## Supplementary Figure S1

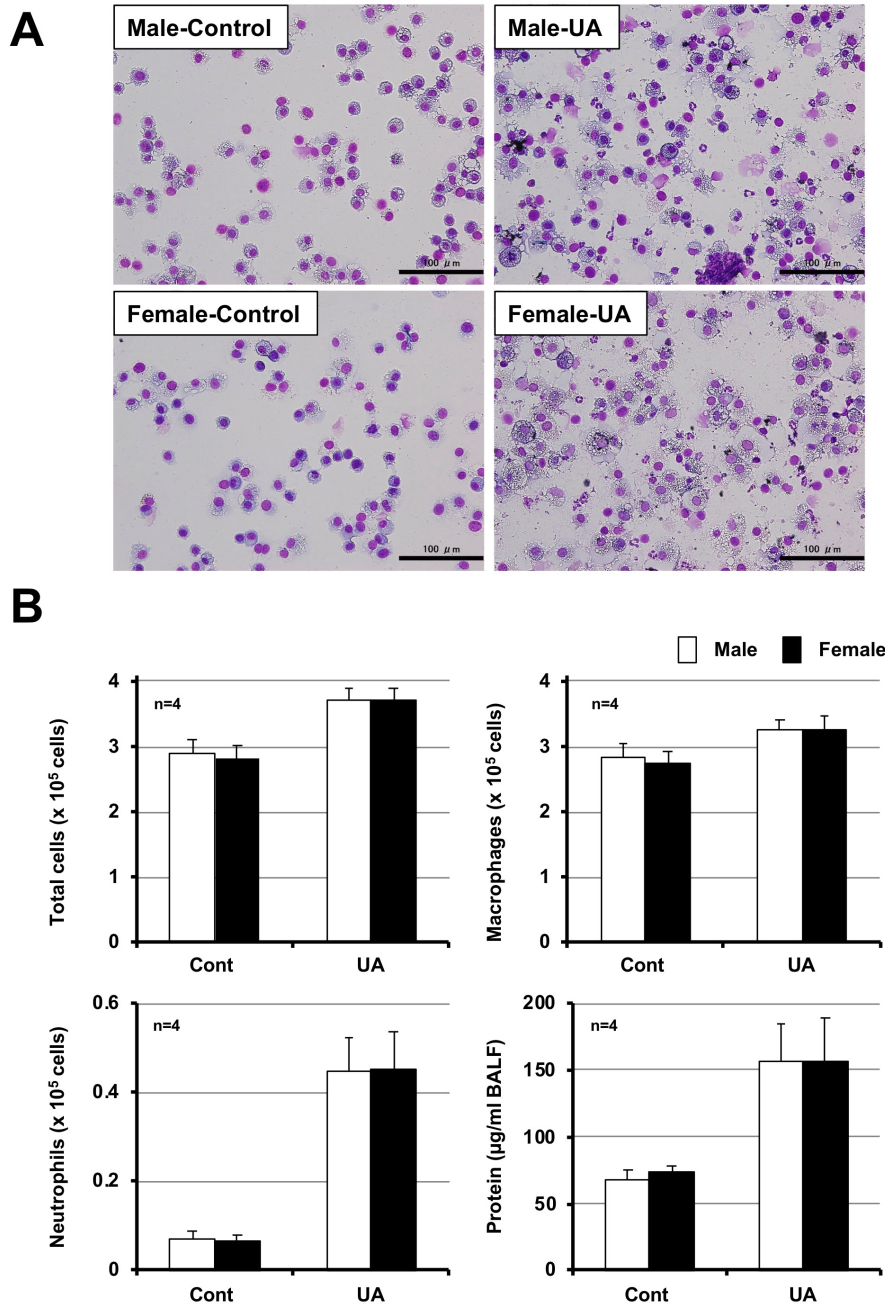

1

### 2 **Supplementary Fig. S1. Urban aerosol-induced lung injury in male or female mice**

3 Male or female ICR mice were intravenously administered sterile saline alone, immediately  
4 before and 24 h after intratracheal administration of urban aerosol particle suspensions  
5 administration (200  $\mu\text{g}/\text{mouse}$ ) or 0.5% methylcellulose solution alone (Cont). BALFs were  
6 prepared 48 h after the intratracheal administration. (A) BALF cells were deposited onto slides  
7 using a Cytospin<sup>®</sup> 4 cytocentrifuge then stained with Diff-Quik reagents and visualized under  
8 light microscopy (scale bar, 100  $\mu\text{m}$ ). (B) The numbers of total cells, macrophages, and  
9 neutrophils were determined. The amount of protein present in the BALF was determined using  
10 the Bradford method. Values are the mean  $\pm$  S.E.M.  
11

## Supplementary Figure S2

**A**

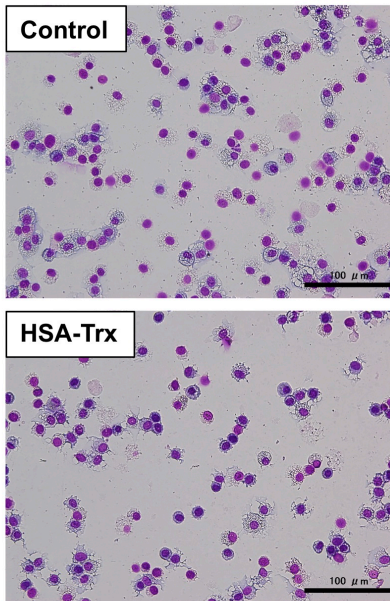

**B**

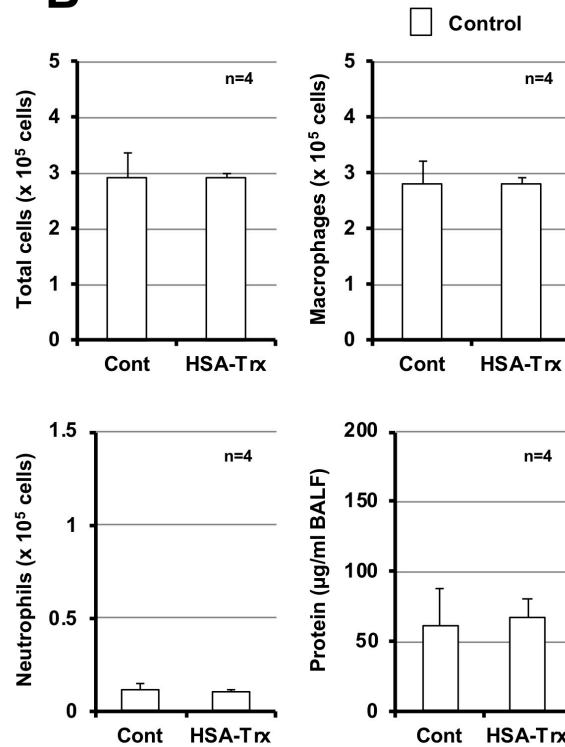

**C**

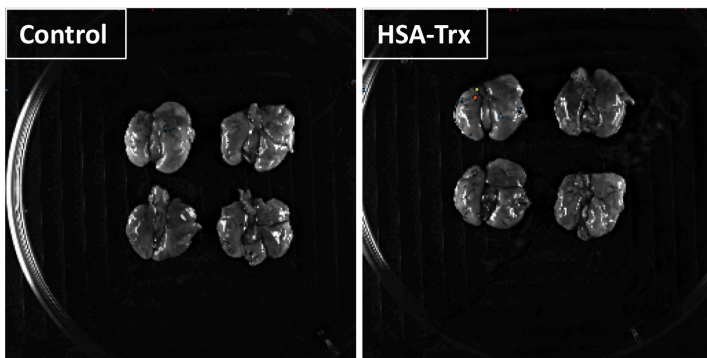

**D**

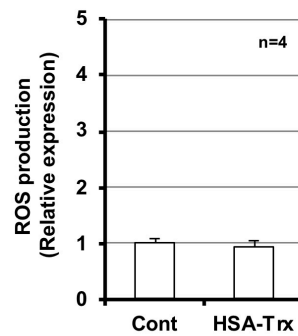

12  
13

### 14 **Supplementary Fig. S2. Effect of administering HSA-Trx alone**

15 Male ICR mice were intravenously administered HSA-Trx (3.5 nmol protein/mouse in sterile  
16 saline) or sterile saline alone, immediately before and 24 h after intratracheal administration of  
17 0.5% methylcellulose solution. BALFs were prepared 48 h after intratracheal administration of  
18 0.5% methylcellulose solution. (A) BALF cells were deposited onto slides using a Cytospin<sup>®</sup> 4  
19 cytocentrifuge then stained with Diff-Quik reagents and visualized under light microscopy  
20 (scale bar, 100 μm). (B) The numbers of total cells, macrophages, and neutrophils were  
21 determined. The amount of protein present in the BALF was determined by the Bradford  
22 method. (C) Luminescent probe (L-012, 75 mg/kg) was administered 24.5 h after the 0.5%  
23 methylcellulose solution administration. Isolated lungs were imaged using a FUSION  
24 chemiluminescence imaging system. (D) The summed pixel intensity of the ROS signal was  
25 determined using standard software for FUSION. Values are the mean ± S.E.M.
